# Supplementary material for: A study protocol for a feasibility study: Propofol Target-Controlled Infusion in Emergency Department Sedation (ProTEDS)—a multi-centre feasibility study protocol
Source: PubMed Central journal article supplement (PMC6378735; doi:10.1186/s40814-019-0412-y), 2019-02-18
Supplement: 40814_2019_412_MOESM2_ESM.pdf [file 40814_2019_412_MOESM2_ESM.pdf]

How would you rate the patient's experience of the procedure whilst sedated? Please mark on the line below with a vertical mark.

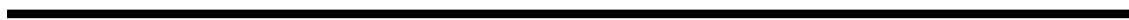

Poor Experience

Excellent Experience
