# Supplementary material for: A study protocol for a feasibility study: Propofol Target-Controlled Infusion in Emergency Department Sedation (ProTEDS)—a multi-centre feasibility study protocol
Source: PubMed Central journal article supplement (PMC6378735; doi:10.1186/s40814-019-0412-y), 2019-02-18
Supplement: 40814_2019_412_MOESM4_ESM.pdf [file 40814_2019_412_MOESM4_ESM.pdf]

Apply patient monitoring and secure suitable IV access  
Connect patient to the TCI pump and commence supplemental O<sub>2</sub> at 4 L min<sup>-1</sup>

**INITIAL PHASE:** Set C<sub>pT</sub> at 1.4µg ml<sup>-1</sup> and Start TCI propofol (1%). Monitor C<sub>eT</sub> and assess sedation as C<sub>eT</sub> rises to 1.0 µg ml<sup>-1</sup>, 1.2µg ml<sup>-1</sup> and 1.4µg ml<sup>-1</sup>. The patient is likely to be under sedated in this initial phase but follow the algorithm below if they become adequately sedated or require no further sedation.  
If the patient remains under sedated when C<sub>pT</sub> and C<sub>eT</sub> = 1.4µg ml<sup>-1</sup> then proceed to the **TITRATION PHASE**.

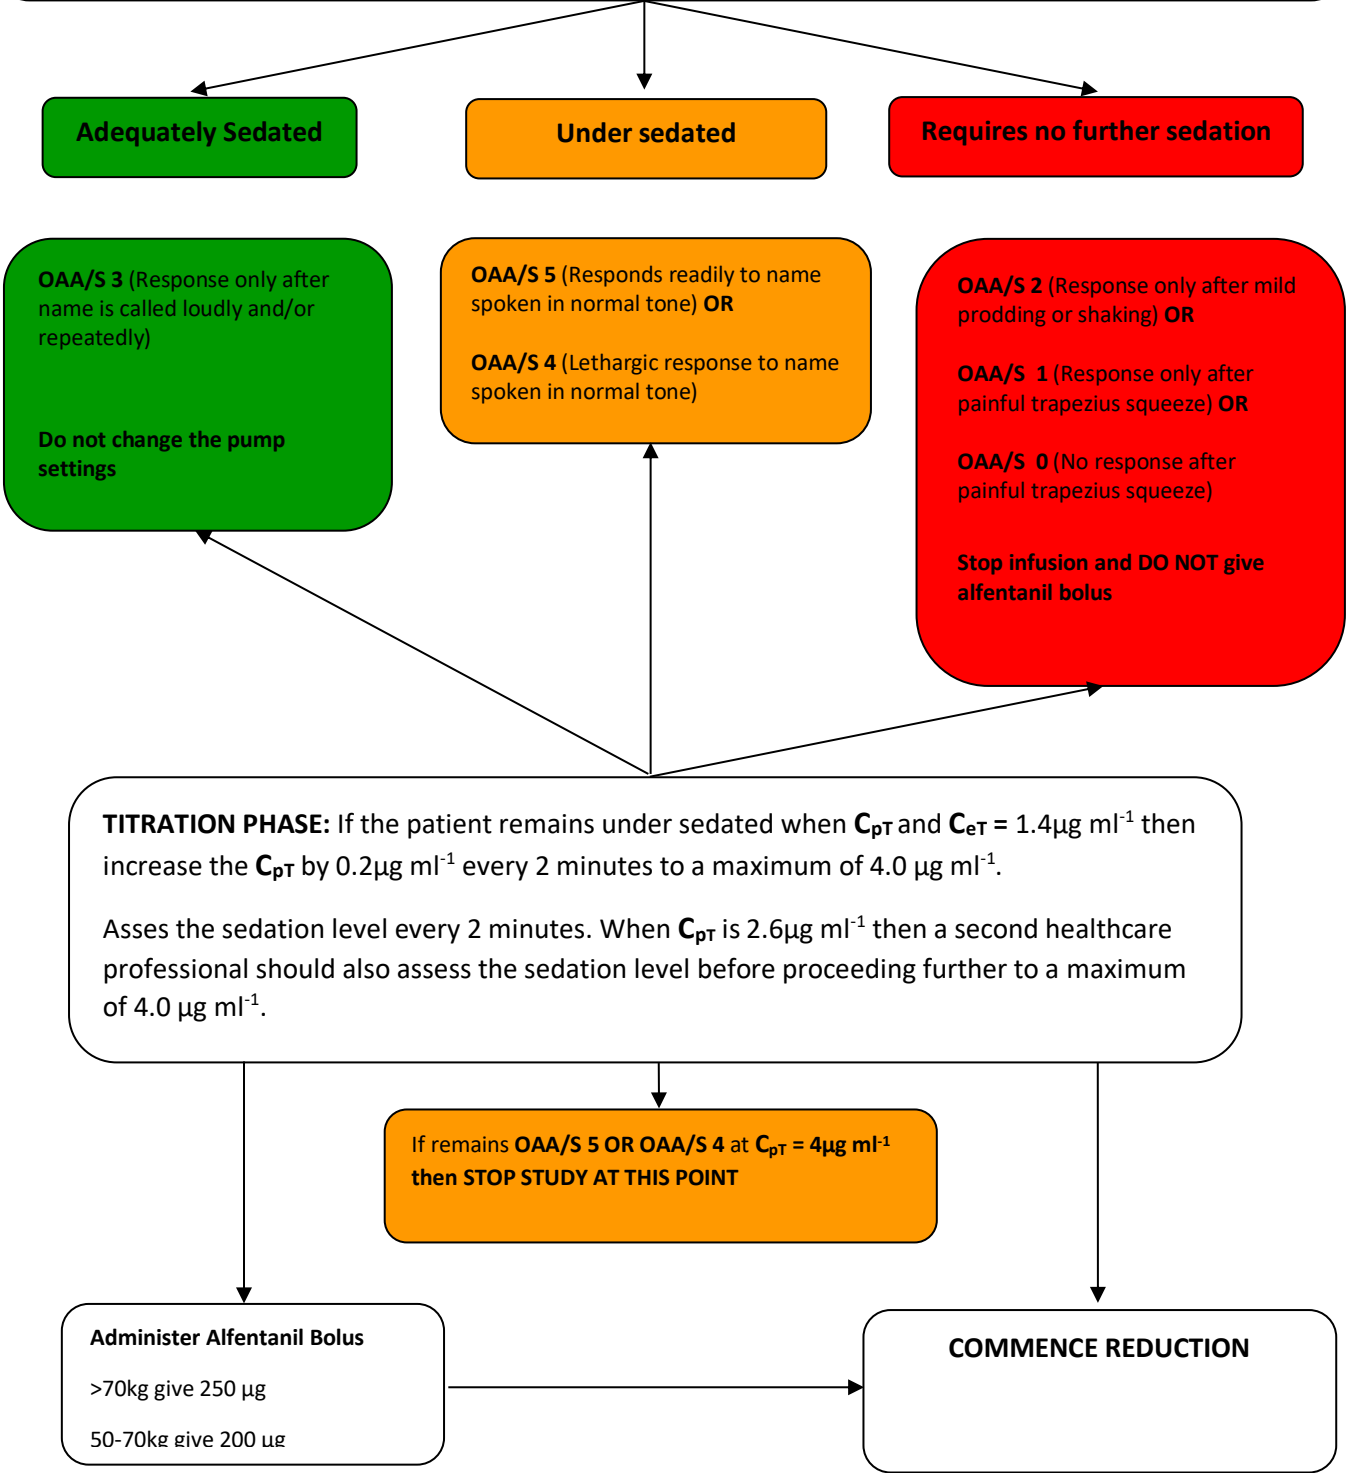

On completion of the reduction the infusion should be stopped and the patient observed until complete recovery  
If an adverse event occurs, the TCI should be stopped immediately
