# Supplementary material for: A study protocol for a feasibility study: Propofol Target-Controlled Infusion in Emergency Department Sedation (ProTEDS)—a multi-centre feasibility study protocol
Source: PubMed Central journal article supplement (PMC6378735; doi:10.1186/s40814-019-0412-y), 2019-02-18
Supplement: 40814_2019_412_MOESM5_ESM.pdf [file 40814_2019_412_MOESM5_ESM.pdf]

5. Responds readily to name spoken in normal tone
4. Lethargic response to name spoken in normal tone
3. Response only after name is called loudly and/or repeatedly
2. Response only after mild prodding or shaking
1. Response only after painful trapezius squeeze
0. No response after painful trapezius squeeze
